# Significance Analysis of Prognostic Signatures

Andrew H. Beck<sup>1\*</sup>, Nicholas W. Knoblauch<sup>1</sup>, Marco M. Hefti<sup>1</sup>, Jennifer Kaplan<sup>1</sup>, Stuart J. Schnitt<sup>1</sup>, Aedin C. Culhane<sup>2,3</sup>, Markus S. Schroeder<sup>2,3</sup>, Thomas Risch<sup>2,3</sup>, John Quackenbush<sup>2,3,4</sup>, Benjamin Haibe-Kains<sup>5\*</sup>

**1** Department of Pathology, Beth Israel Deaconess Medical Center and Harvard Medical School, Boston, Massachusetts, United States of America, **2** Biostatistics and Computational Biology, Dana-Farber Cancer Institute, Boston, Massachusetts, United States of America, **3** Biostatistics, Harvard School of Public Health, Boston, Massachusetts, United States of America, **4** Cancer Biology, Dana-Farber Cancer Institute, Boston, Massachusetts, United States of America, **5** Bioinformatics and Computational Genomics Laboratory, Institut de Recherches Cliniques de Montréal (IRCM), Montreal, Quebec, Canada

## Abstract

A major goal in translational cancer research is to identify biological signatures driving cancer progression and metastasis. A common technique applied in genomics research is to cluster patients using gene expression data from a candidate prognostic gene set, and if the resulting clusters show statistically significant outcome stratification, to associate the gene set with prognosis, suggesting its biological and clinical importance. Recent work has questioned the validity of this approach by showing in several breast cancer data sets that “random” gene sets tend to cluster patients into prognostically variable subgroups. This work suggests that new rigorous statistical methods are needed to identify biologically informative prognostic gene sets. To address this problem, we developed Significance Analysis of Prognostic Signatures (SAPS) which integrates standard prognostic tests with a new prognostic significance test based on stratifying patients into prognostic subtypes with random gene sets. SAPS ensures that a significant gene set is not only able to stratify patients into prognostically variable groups, but is also enriched for genes showing strong univariate associations with patient prognosis, and performs significantly better than random gene sets. We use SAPS to perform a large meta-analysis (the largest completed to date) of prognostic pathways in breast and ovarian cancer and their molecular subtypes. Our analyses show that only a small subset of the gene sets found statistically significant using standard measures achieve significance by SAPS. We identify new prognostic signatures in breast and ovarian cancer and their corresponding molecular subtypes, and we show that prognostic signatures in ER negative breast cancer are more similar to prognostic signatures in ovarian cancer than to prognostic signatures in ER positive breast cancer. SAPS is a powerful new method for deriving robust prognostic biological signatures from clinically annotated genomic datasets.

**Citation:** Beck AH, Knoblauch NW, Hefti MM, Kaplan J, Schnitt SJ, et al. (2013) Significance Analysis of Prognostic Signatures. PLoS Comput Biol 9(1): e1002875. doi:10.1371/journal.pcbi.1002875

**Editor:** Greg Tucker-Kellogg, National University of Singapore, Singapore

**Received:** July 20, 2012; **Accepted:** November 21, 2012; **Published:** January 24, 2013

**Copyright:** © 2013 Beck et al. This is an open-access article distributed under the terms of the Creative Commons Attribution License, which permits unrestricted use, distribution, and reproduction in any medium, provided the original author and source are credited.

**Funding:** AHB was supported by an award from the Klarman Family Foundation. The funders had no role in study design, data collection and analysis, decision to publish, or preparation of the manuscript.

**Competing Interests:** The authors have declared that no competing interests exist.

\* E-mail: abeck2@bidmc.harvard.edu (AHB); bhaibeka@ircm.qc.ca (BHK)

## Introduction

The identification of pathways that predict prognosis in cancer is important for enhancing our understanding of the biology of cancer progression and for identifying new therapeutic targets. There are three widely-recognized breast cancer molecular subtypes, “luminal” (ER+/HER2−) [1,2,3,4], “HER2-enriched” (HER2+) [5,6] and “basal-like” (ER−/HER2−) [6,7,8,9] and a considerable body of work has focused on defining prognostic signatures in these [10,11]. Several groups have analyzed prognostic biological pathways across breast cancer molecular subtypes [12,13,14]; a tacit assumption is that if a gene signature is associated with prognosis, it is likely to encode a biological signature driving carcinogenesis.

Recent work by Venet et al. has questioned the validity of this assumption by showing that most random gene sets are able to separate breast cancer cases into groups exhibiting significant survival differences [15]. This suggests that it is not valid to infer the biologic significance of a gene set in breast cancer based on its association with breast cancer prognosis and further, that new

rigorous statistical methods are needed to identify biologically informative prognostic pathways.

To this end, we developed Significance Analysis of Prognostic Signatures (SAPS). The score derived from SAPS summarizes three distinct significance tests related to a candidate gene set’s association with patient prognosis. The statistical significance of the  $SAPS_{score}$  is estimated using an empirical permutation-based procedure to estimate the proportion of random gene sets achieving at least as significant a SAPS score as the candidate prognostic gene set. We apply SAPS to a large breast cancer meta-dataset and identify prognostic genes sets in breast cancer overall, as well as within breast cancer molecular subtypes. Only a small subset of gene sets that achieve statistical significance using standard statistical measures achieves significance using SAPS. Further, the gene sets identified by SAPS provide new insight into the mechanisms driving breast cancer development and progression.

To assess the generalizability of SAPS, we apply it to a large ovarian cancer meta-dataset and identify significant prognostic gene sets. Lastly, we compare prognostic gene sets in breast and

## Author Summary

A major goal in biomedical research is to identify sets of genes (or “biological signatures”) associated with patient survival, as these genes could be targeted to aid in diagnosing and treating disease. A major challenge in using prognostic associations to identify biologically informative signatures is that in some diseases, “random” gene sets are associated with prognosis. To address this problem, we developed a new method called “Significance Analysis of Prognostic Signatures” (or “SAPS”) for the identification of biologically informative gene sets associated with patient survival. To test the effectiveness of SAPS, we use SAPS to perform a subtype-specific meta-analysis of prognostic signatures in large breast and ovarian cancer meta-data sets. This analysis represents the largest of its kind ever performed. Our analyses show that only a small subset of the gene sets found statistically significant using standard measures achieve significance by SAPS. We identify new prognostic signatures in breast and ovarian cancer and their corresponding molecular subtypes, and we demonstrate a striking similarity between prognostic pathways in ER negative breast cancer and ovarian cancer, suggesting new shared therapeutic targets for these aggressive malignancies. SAPS is a powerful new method for deriving robust prognostic biological pathways from clinically annotated genomic datasets.

ovarian cancer molecular subtypes, identifying a core set of shared biological signatures driving prognosis in ER+ breast cancer molecular subtypes, a distinct core set of signatures associated with prognosis in ER– breast cancer and ovarian cancer molecular subtypes, and a set of signatures associated with improved prognosis across breast and ovarian cancer.

## Results

### Significance Analysis of Prognostic Signatures (SAPS)

The assumption behind SAPS is that to use a prognostic association to indicate the biological significance of a gene set, a gene set should achieve three distinct and complimentary objectives. First, the gene set should cluster patients into groups that show survival differences. Second, the gene set should perform significantly better than random gene sets at this task, and third, the gene set should be enriched for genes that show strong univariate associations with prognosis.

To achieve this end, SAPS computes three p-values ( $P_{pure}$ ,  $P_{random}$ , and  $P_{enrichment}$ ) for a candidate prognostic gene set. These individual *P-Values* are summarized in the  $SAPS_{score}$ . The statistical significance of the  $SAPS_{score}$  is estimated by permutation testing involving permuting the gene labels (**Figure 1**).

To compute the  $P_{pure}$ , we stratify patients into two groups by performing k-means clustering ( $k=2$ ) of an  $n \times p$  data matrix, consisting of the  $n$  patients in the dataset and the  $p$  genes in the candidate prognostic gene set. We then compute a log-rank *P-Value* to indicate the probability that the two groups of patients show no survival difference (**Figure 1A**).

Next, we assess the probability that a random gene set would perform as well as the candidate gene set in clustering cases into prognostically variable groups. This *P-Value* is the  $P_{random}$ . To compute the  $P_{random}$ , we randomly sample genes to create random gene sets of similar size to the candidate gene set. We randomly sample  $r$  gene sets, and for each random gene set we determine a  $\bar{P}_{pure}$  using the procedure described above. The  $P_{random}$  is the

proportion of  $\bar{P}_{pure}$  at least as significant as the true observed  $P_{pure}$  for the candidate gene set (**Figure 1B**).

$$\frac{\sum_r [\bar{P}_{pure} \text{Pr}_{\text{ogno}sis} \leq P_{pure} \text{Pr}_{\text{ogno}sis}]}{r}$$

Third, we compute the  $P_{enrichment}$  to indicate if a candidate gene set is enriched for prognostic genes. While the procedure to compute the  $P_{pure}$  uses the label determined by k-means clustering with a candidate gene set as a binary feature to correlate with survival, the procedure to compute the  $P_{enrichment}$  uses the univariate prognostic association of genes within a candidate gene to produce a gene set enrichment score to indicate the degree to which a gene set is enriched for genes that show strong univariate associations with survival (**Figure 1C**). To compute the  $P_{enrichment}$ , we first rank all the genes in our meta-dataset according to their concordance index by using the function `concordance.index` in the *survcomp* package in R [16]. The concordance index of a gene represents the probability that, for a pair of patients randomly selected in our dataset, the patient whose tumor expresses that gene at a higher level will experience the appearance of distant metastasis or death before the other patient. Based on this genome-wide ranking we perform a pre-ranked GSEA [17,18] to identify the candidate gene sets that are significantly enriched in genes with either significantly low or high concordance indices. The GSEA procedure for SAPS has two basic steps. First, an enrichment score is computed to indicate the overrepresentation of a candidate gene set at the top or bottom extremes of the ranked list of concordance indices. This enrichment score is normalized to account for a candidate gene set's size. Second, the statistical significance of the normalized enrichment score is estimated by permuting the genes to generate the  $P_{enrichment}$  (see Refs. [17,18] for further description of pre-ranked GSEA procedure), which indicates the probability that a similarly sized random gene set would achieve at least as extreme a normalized enrichment score as the candidate gene set (**Figure 1C**).

The  $SAPS_{score}$  for each candidate gene set is then computed as the negative  $\log_{10}$  of the maximum of the ( $P_{pure}$ ,  $P_{random}$ , and  $P_{enrichment}$ ) times the direction of the association (positive or negative) (**Figure 1D**). For a given candidate gene set, the  $SAPS_{score}$  specifies the direction of the prognostic association as well as indicates the raw *P-Value* achieved on all 3 of the ( $P_{pure \text{ prognosis}}$ ,  $P_{random \text{ prognosis}}$ , and  $P_{enrichment}$ ). Since we take the negative  $\log_{10}$  of the maximum of the ( $P_{pure \text{ prognosis}}$ ,  $P_{random \text{ prognosis}}$ , and  $P_{enrichment}$ ), the larger the absolute value of the  $SAPS_{score}$  the more significant the prognostic association of all 3 *P-Values*. The statistical significance of the  $SAPS_{score}$  is determined by permuting genes, generating a null distribution for the  $SAPS_{score}$  and computing the proportion of similarly sized gene sets from the null distribution achieving at least as large an absolute value of the  $SAPS_{score}$  as that observed with the candidate gene set. When multiple candidate gene sets are evaluated, after generating each gene set's raw  $SAPS_{P-Value}$  by permutation testing, we account for multiple hypotheses and control the false discovery rate using the method of Benjamini and Hochberg [19] to generate the  $SAPS_{q-value}$  (**Figure 1E**). In our experiments, we have required a minimum absolute value ( $SAPS_{score}$ ) of greater than 1.3 and a maximum  $SAPS_{q-value}$  of less than 0.05 to consider a gene set prognostically significant. These thresholds ensure that a significant prognostic gene set will have achieved a raw *P-Value* of less than or equal to 0.05 for each of  $P_{pure}$ ,  $P_{random}$ , and  $P_{enrichment}$ , and will have achieved an overall  $SAPS_{q-Value}$  of less than or equal to 0.05.

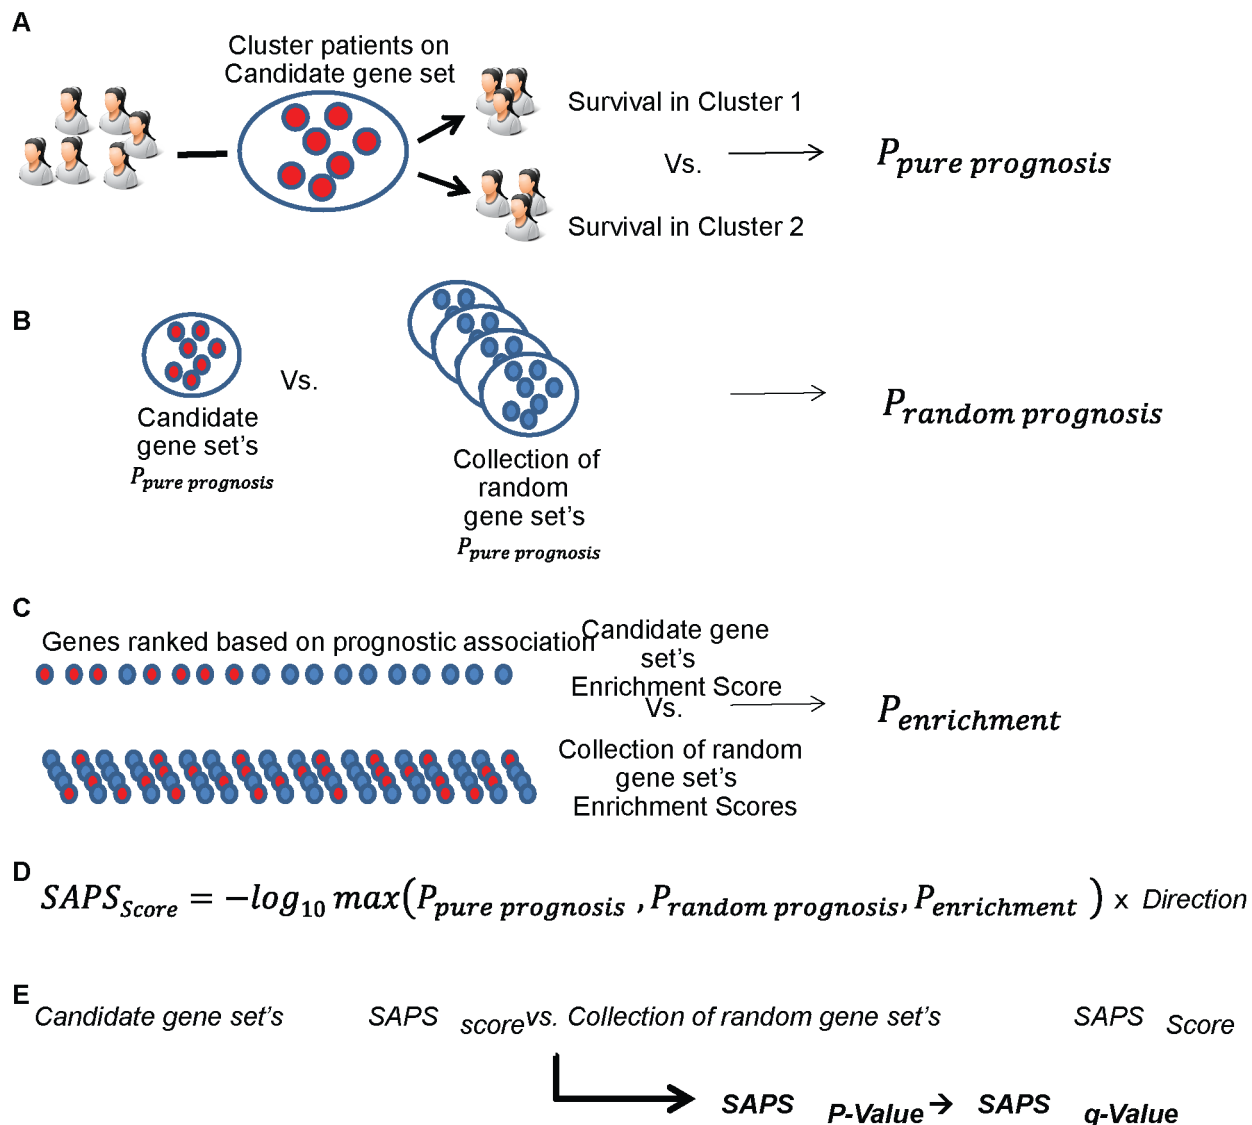

**Figure 1. Overview of SAPS method.** The SAPS method computes three P values for a candidate gene set (A–C). These P values are summarized in the  $SAPS_{\text{score}}$  (D) and statistical significance of a  $SAPS_{\text{score}}$  is estimated by permutation testing (E). doi:10.1371/journal.pcbi.1002875.g001

## Application and Validation

We chose two model systems to investigate the performance of SAPS. The first is a curated sample of breast cancer datasets previously described in Haibe-Kains *et al.* [20]. Our analysis focused on nineteen datasets with patient survival information (total  $n = 3832$ ) (Table S1). The second dataset was a compendium of twelve ovarian cancer datasets with survival data, as described in Bentink *et al.* [21], which includes data from 1735 ovarian cancer patients for whom overall survival data were available (Table S2).

## Identifying Molecular Subtypes

In breast cancer, we used SCMGene [20] as implemented in the R/Bioconductor *geneFu* package [22] to assign patients to one of four molecular subtypes: ER+/HER2– low proliferation, ER+/HER2– high proliferation, ER–/HER2– and HER2+. In ovarian cancer, we used the ovcAngiogenic model [21] as

implemented in *geneFu* to classify patients as having disease of either angiogenic or non-angiogenic subtype.

## Data Scaling and Merging

One challenge in the analysis of large published datasets is the heterogeneity of the platforms used to collect data (see Table S1 and Table S2). To standardize the data, we used normalized  $\log_2(\text{intensity})$  for single-channel platforms and  $\log_2(\text{ratio})$  in dual-channel platforms. Hybridization probes were mapped to Entrez GeneID as described in Shi *et al.* [23] using RefSeq and Entrez whenever possible; otherwise mapping was performed using IDconverter (<http://idconverter.bioinfo.cnio.es>) [24]. When multiple probes mapped to the same Entrez GeneID, we used the one with the highest variance in the dataset under study.

To allow for simultaneous analysis of datasets from multiple institutions, we tested two data merging protocols. First, we scaled and centered each expression feature across all patients in each

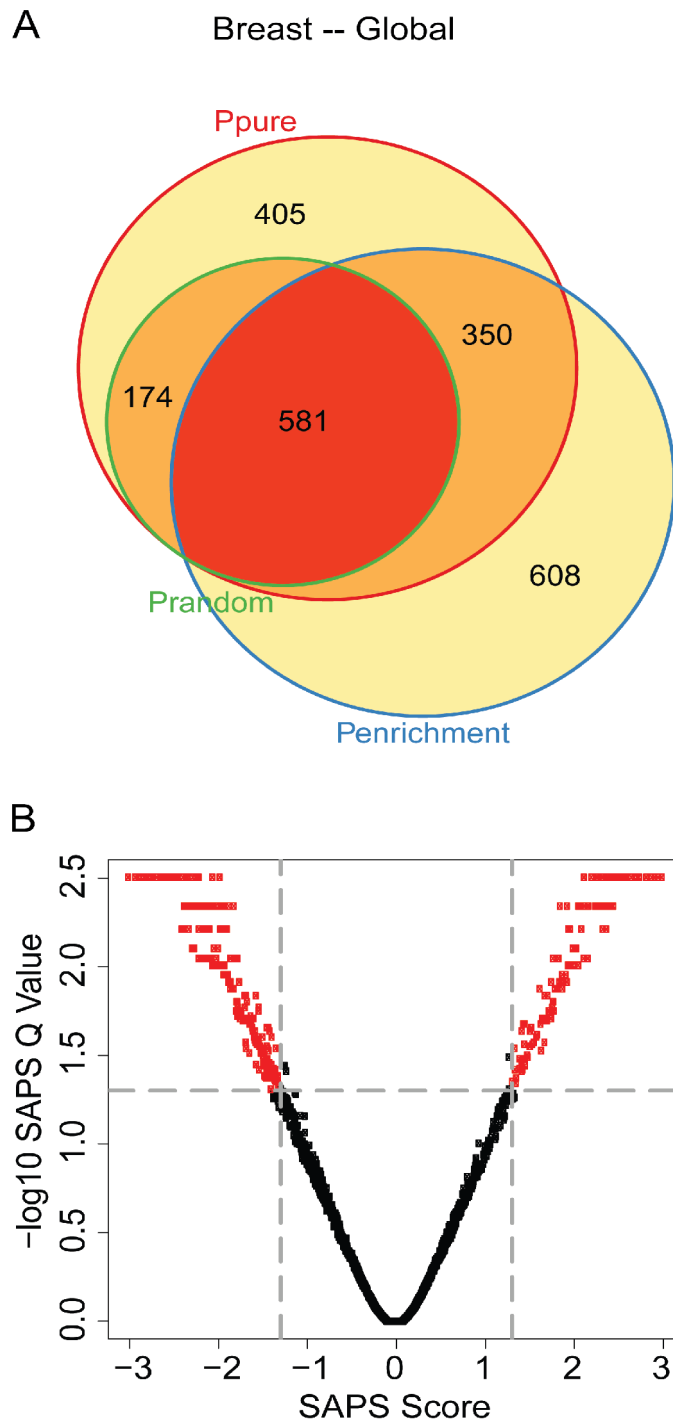

**Figure 2. Global breast cancer Venn diagram and scatterplot.** (A) The gene sets significant by at least one of the P values at the 0.05 level are displayed in a Venn diagram. (B) The  $-\log_{10}$  of the  $SAPS_{q\text{-value}}$  is plotted on the y-axis and the  $SAPS_{score}$  along the x axis for each of the 5320 gene sets in the Molecular Signatures Database for their prognostic significance in breast cancer overall. Each point in the scatterplot represents a gene set, and gene sets that achieved a  $SAPS_{q\text{-value}} \leq 0.05$  and an absolute value ( $SAPS_{score} \geq 1.3$ ) are colored in red.  
doi:10.1371/journal.pcbi.1002875.g002

dataset (standard  $Z$  scores), and we merged the scaled data from the different datasets (“traditional scaling”). In a second scaling procedure, we first assigned each patient in each data set to a breast or ovarian cancer molecular subtype, using the SCMGENE [20] and ovcAngiogenic [21] models, respectively. We then scaled and centered each expression feature separately within a specific

molecular subtype within each dataset, so that each expression value was transformed into a  $Z$  score indicating the level of expression within patients of a specific molecular subtype within a dataset (“subtype-specific scaling”).

After merging datasets, we removed genes with missing data in more than half of the samples and we removed samples that were

**Table 1.** Top prognostic signatures in global breast cancer.

|                                           | Size | SAPS <sub>q-value</sub> | SAPS <sub>score</sub> | P <sub>pure</sub> | P <sub>random</sub> | P <sub>enrichment</sub> | Dir  |
|-------------------------------------------|------|-------------------------|-----------------------|-------------------|---------------------|-------------------------|------|
| NADERI_BREAST_CANCER_PROGNOSIS_UP         | 34   | 0.0031                  | 3                     | 2.7E-09           | 0.0001              | 0.001                   | Poor |
| HAHTOLA_MYCOSIS_FUNGOIDES_DN              | 16   | 0.0031                  | −3                    | 4.4E-09           | 0.0001              | 0.001                   | Good |
| VANTVEER_BREAST_CANCER_POOR_PROGNOSIS     | 44   | 0.0031                  | 3                     | 1.1E-08           | 0.0001              | 0.001                   | Poor |
| LU_TUMOR_VASCULATURE_DN                   | 9    | 0.0031                  | −3                    | 2.8E-08           | 0.0002              | 0.001                   | Good |
| MILICIC_FAMILIAL_ADENOMATOUS_POLYPOSIS_DN | 9    | 0.0031                  | −3                    | 4.3E-08           | 0.0003              | 0.001                   | Good |
| VANTVEER_BREAST_CANCER_METASTASIS_DN      | 100  | 0.0031                  | 3                     | 5E-08             | 0.0001              | 0.001                   | Poor |
| SEMBA_FHIT_TARGETS_DN                     | 9    | 0.0031                  | 3                     | 7.5E-08           | 0.0003              | 0.001                   | Poor |
| BIOCARTA_IL2RB_PATHWAY                    | 38   | 0.0031                  | −3                    | 8.6E-08           | 0.0001              | 0.001                   | Good |
| SOTIRIOU_BREAST_CANCER_GRADE_1_VS_3_UP    | 150  | 0.0031                  | 3                     | 1E-07             | 0.0001              | 0.001                   | Poor |
| CELL_DIVISION                             | 19   | 0.0031                  | 3                     | 1.3E-07           | 0.0008              | 0.001                   | Poor |

Gene sets in the analysis come from the Broad institute's MSigDB. These gene sets can be further evaluated at <http://www.broadinstitute.org/gsea/msigdb/search.jsp>. doi:10.1371/journal.pcbi.1002875.t001

missing data on more than half of the genes or for which there was no information on distant metastasis free survival (for breast) or overall survival (for ovarian). The resulting breast cancer dataset contained 2731 cases with 13091 unique Entrez gene IDs and the ovarian cancer dataset had 1670 cases and 11247 unique Entrez gene IDs for. For each of these reduced data matrices, we estimated missing values using the function `knn.impute` in the `impute` package in R [25].

Given that breast cancer is an extremely heterogeneous disease with well-defined disease subtypes, and a primary objective of our work is to identify subtype-specific prognostic pathways in breast cancer, we focus our subsequent analyses on the subtype-specific scaled data. Given that ovarian cancer subtypes are more subtle and less well defined than breast cancer molecular subtypes, we focus our subsequent analyses in ovarian cancer on the traditional scaled data. SAPS scores in breast and ovarian cancer generated from the two different scaling procedures showed moderate to strong correlation across the breast and ovarian cancer molecular subtypes.

### Gene Sets

We downloaded gene sets from the Molecular Signatures Database (MSigDB) [17] (<http://www.broadinstitute.org/gsea/msigdb/collections.jsp>) (“`molsigdb.v3.0.entrez.gmt`”). MSigDB contains 5 major collections (positional gene sets, curated gene sets, motif gene sets, computational gene sets, and GO gene sets) comprising of a total of 6769 gene sets. We limited our analysis to gene sets with less than or equal to 250 genes and valid data for genes included in the meta-data sets, resulting in 5320 gene sets in the breast cancer analysis and 5355 in the ovarian cancer analysis.

### Application of SAPS to Breast Cancer

We first applied SAPS to the entire collection of breast cancer cases independent of subtype. Of the 5320 gene sets evaluated, 1510 (28%) achieved a raw *P*-Value of 0.05 by *P*<sub>pure</sub>, 1539 (29%) by *P*<sub>enrichments</sub>, 755 (14%) by *P*<sub>random</sub>, 581 (11%) by all 3 raw *P*-Values, and 564 (11%) of these are significant at the SAPS<sub>q-value</sub> of 0.05 (**Figure 2**).

The top-ranked gene sets identified by SAPS and associated with poor prognosis in all breast cancers independent of subtype contained gene sets previously found to be associated with poor prognosis in breast cancer (**Table 1**). Thus it is not surprising that these emerged as the most significant, and this result serves as a measure of validation. We note that the list of top gene sets

associated with poor breast cancer prognosis identified in our overall analysis includes the gene set VANTVEER\_BREAST\_CANCER\_METASTASIS\_DN, which according to the Molecular Signatures Database website is defined as “Genes whose expression is significantly and negatively correlated with poor breast cancer clinical outcome (defined as developing distant metastases in less than 5 years).” Our analysis suggests that the set of genes is positively correlated with poor breast cancer clinical outcome. Comparison the gene list to the published “poor prognosis” gene list from van't Veer et al. [26] confirms that the gene list is mislabeled in the Molecular Signatures Database and is in fact the set of genes positively associated with metastasis in van't Veer et al. [26].

The top-ranking gene sets associated with good prognosis were not originally identified in breast cancers, and represent a range of biological processes. Several were from analyses of hematolymphoid cells, including: genes down-regulated in monocytes isolated from peripheral blood samples of patients with mycosis fungoides compared to those from normal healthy donors, genes associated with the IL-2 receptor beta chain in T cell activation, and genes down-regulated in B2264-19/3 cells (primary B lymphocytes) within 60–180 min after activation of LMP1 (an oncogene encoded by Epstein Barr virus). These gene sets suggest that specific subsets of immune system activation are associated with improved breast cancer prognosis, consistent with reports that the presence infiltrating lymphocytes is predictive of outcome in many cancers.

We then applied SAPS to the ER+/HER2− high proliferation subtype. Of the 5320 gene sets evaluated, 1503 (28%) achieved a raw *P*-Value of 0.05 by *P*<sub>pure</sub>, 1667 (31%) by *P*<sub>enrichments</sub>, 1079 (20%) by *P*<sub>random</sub>, 675 (13%) by all 3 raw *P*-Values, and all 675 of these are significant at the SAPS<sub>q-value</sub> of 0.05. The top-ranking gene sets by SAPS<sub>score</sub> are associated with cancer and proliferation. One of the top-ranking gene sets was associated with Ki67, a well-known prognostic marker in Luminal B breast cancers [27]. Overall, the patterns of significance are highly similar to that seen in breast cancer analyzed independent of subtype (**Figure 3**, **Table 2**).

Next, we used SAPS to analyze the ER+/HER2− low proliferation samples. Of the 5320 gene sets evaluated, 494 (9%) achieved a raw *P*-Value of 0.05 by *P*<sub>pure</sub>, 1113 (21%) by *P*<sub>enrichments</sub>, 939 (18%) by *P*<sub>random</sub>, 303 (6%) by all 3 raw *P*-Values, and all 303 of these were significant at the SAPS<sub>q-value</sub> of 0.05. The top-ranking ER+/HER2− low proliferation prognostic gene sets by SAPS<sub>score</sub> are also highly enriched for genes involved in proliferation

## A Breast, ER+/HER2- high proliferation

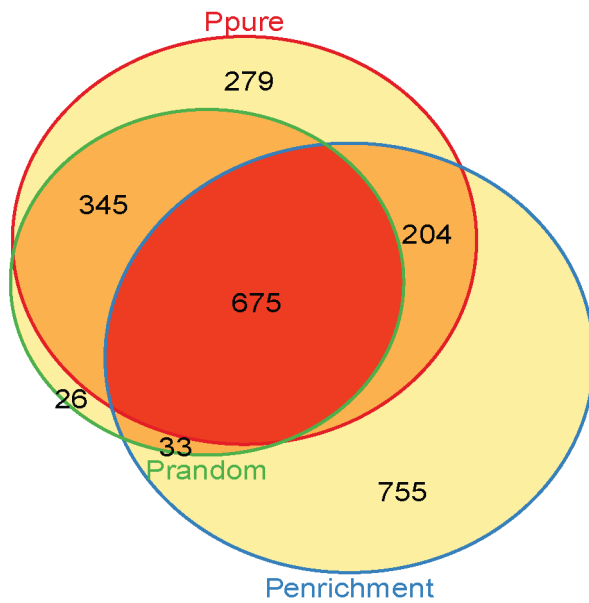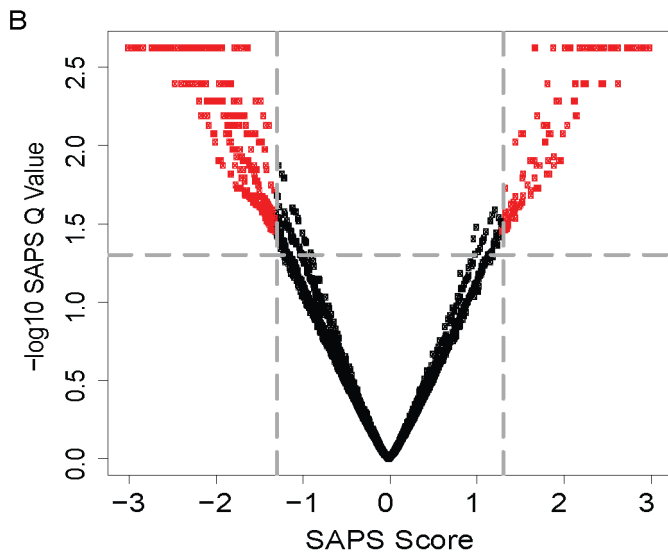

**Figure 3. ER+/HER2- high proliferation Venn diagram and scatterplot.** (A) The gene sets significant by at least one of the P values at the 0.05 level are displayed in a Venn diagram. (B) The  $-\log_{10}$  of the  $SAPS_{q\text{-value}}$  is plotted on the y-axis and the  $SAPS_{\text{score}}$  along the x axis for each of the 5320 gene sets in the Molecular Signatures Database for their prognostic significance in the ER+/HER2- breast cancer molecular subtype. Each point in the scatterplot represents a gene set, and gene sets that achieved a  $SAPS_{q\text{-value}} \leq 0.05$  and an absolute value ( $SAPS_{\text{score}} \geq 1.3$ ) are colored in red. doi:10.1371/journal.pcbi.1002875.g003

(Figure 4, Table 3). Top ranking gene sets associated with good prognosis include those highly expressed in lobular breast carcinoma relative to ductal and inflammation-associated genes up-regulated following infection with human cytomegalovirus.

Then, we applied SAPS to the HER2+ subset. Of the 5320 gene sets evaluated, 1247 (23%) achieved a raw  $P$ -Value of 0.05 by  $P_{\text{pure}}$ , 1425 (27%) by  $P_{\text{enrichment}}$ , 683 (13%) by  $P_{\text{random}}$ , 439 (8%) by all 3 raw  $P$ -Values, and 342 (6%) of these are significant at the  $SAPS_{q\text{-value}}$  of 0.05. Most of the top-ranking prognostic pathways in the HER2+ group by  $SAPS_{\text{score}}$  are associated with better prognosis and include several gene sets associated with inflammatory

response (Figure 5, Table 4). A gene set containing genes down-regulated in multiple myeloma cell lines treated with the hypomethylating agents decitabine and trichostatin A was significantly associated with improved prognosis in HER2+ breast cancer. The top-ranking gene set associated with decreased survival is a hypoxia-associated gene set. Hypoxia is a well-known prognostic factor in breast cancer [28,29], and our analysis suggests it shows a very strong association with survival in the HER2+ breast cancer molecular subtype.

Finally, we used SAPS to analyze the poor-prognosis “basal like” subtype which was classified as being ER-/HER2-. Of the

**Table 2.** Top prognostic signatures in ER+/HER2– high proliferation.

|                                          | Size | <i>SAPS</i> <sub>q-value</sub> | <i>SAPS</i> <sub>score</sub> | <i>P</i> <sub>pure</sub> | <i>P</i> <sub>random</sub> | <i>P</i> <sub>enrichment</sub> | Dir  |
|------------------------------------------|------|--------------------------------|------------------------------|--------------------------|----------------------------|--------------------------------|------|
| LOPEZ_MESOTELIOMA_SURVIVAL_TIME_UP       | 14   | 0.0024                         | 3                            | 9.3E-10                  | 0.0001                     | 0.001                          | Poor |
| VANTVEER_BREAST_CANCER_POOR_PROGNOSIS    | 44   | 0.0024                         | 3                            | 5.5E-09                  | 0.0001                     | 0.001                          | Poor |
| MONTERO_THYROID_CANCER_POOR_SURVIVAL_UP  | 9    | 0.0024                         | 3                            | 1.1E-08                  | 0.0001                     | 0.001                          | Poor |
| VANTVEER_BREAST_CANCER_METASTASIS_DN     | 100  | 0.0024                         | 3                            | 3.3E-08                  | 0.0001                     | 0.001                          | Poor |
| GNF2_MKI67                               | 25   | 0.0024                         | 3                            | 6.6E-08                  | 0.0001                     | 0.001                          | Poor |
| NADERI_BREAST_CANCER_PROGNOSIS_UP        | 34   | 0.0024                         | 3                            | 8.3E-08                  | 0.0001                     | 0.001                          | Poor |
| CHANG_CYCLING_GENES                      | 38   | 0.0024                         | 3                            | 1.3E-07                  | 0.0001                     | 0.001                          | Poor |
| LY_AGING_MIDDLE_DN                       | 15   | 0.0024                         | 3                            | 1.6E-07                  | 0.0001                     | 0.001                          | Poor |
| GNF2_CENPE                               | 36   | 0.0024                         | 3                            | 1.7E-07                  | 0.0001                     | 0.001                          | Poor |
| CHEMNITZ_RESPONSE_TO_PROSTAGLANDIN_E2_UP | 120  | 0.0024                         | 3                            | 2E-07                    | 0.0001                     | 0.001                          | Poor |

Gene sets in the analysis come from the Broad institute’s MSigDB. These gene sets can be further evaluated at <http://www.broadinstitute.org/gsea/msigdb/search.jsp>. doi:10.1371/journal.pcbi.1002875.t002

5320 gene sets evaluated, 786 (15%) achieved a raw *P*-Value of 0.05 by *P*<sub>pure</sub>, 1208 (23%) by *P*<sub>enrichment</sub>, 304 (6%) by *P*<sub>random</sub>, 126 (2%) by all 3 raw *P*-Values, and 25 (0.5%) of these are significant at the *SAPS*<sub>q-value</sub> of 0.05. Top-ranking gene sets associated with poor survival include genes up-regulated in MCF7 breast cancer cells treated with hypoxia mimetic DMOG, genes down-regulated in MCF7 cells after knockdown of HIF1A and HIF2A, genes regulated by hypoxia based on literature searches, genes up-regulated in response to both hypoxia and overexpression of an active form of HIF1A, and genes down-regulated in fibroblasts with defective XPC (an important DNA damage response protein) in response to cisplatin (Figure 6, Table 5). This analysis suggests that hypoxia-associated gene sets are key drivers of poor prognosis in HER2+ and ER–/HER2– breast cancer subtypes. Interestingly, cisplatin is an agent with activity in ER–/HER2– breast cancer, and it has been suggested that ER–/HER2– breast cancers with defective DNA repair may show increased susceptibility to cisplatin [30].

Application of SAPS to Ovarian Cancer

Our analysis for ovarian cancer was similar to that for breast cancer. We began by applying SAPS to the entire collection of ovarian cancer samples independent of subtype. Of the 5355 gene sets evaluated, 1190 (22%) achieved a raw *P*-Value of 0.05 by *P*<sub>pure</sub>, 1391 (26%) by *P*<sub>enrichment</sub>, 755 (14%) by *P*<sub>random</sub>, 497 (9%) by all 3 raw *P*-Values (Figure 7, Table 6), and all 497 of these are significant at the *SAPS*<sub>q-value</sub> of 0.05. The top gene sets are involved in stem cell-related pathways and pathways related to epithelial-mesenchymal transition, including genes up-regulated in HMLE cells (immortalized non-transformed mammary epithelium) after E-cadherin (CDH1) knockdown by RNAi, genes down-regulated in adipose tissue mesenchymal stem cells vs. bone marrow mesenchymal stem cells, genes down-regulated in medullary breast cancer relative to ductal breast cancer, genes down-regulated in basal-like breast cancer cell lines as compared to the mesenchymal-like cell lines, genes up-regulated in metaplastic carcinoma of the breast subclass 2 compared to the medullary carcinoma subclass 1, and genes down-regulated in invasive ductal carcinoma compared to invasive lobular carcinoma.

We then analyzed the angiogenic subtype. Of the 5355 gene sets evaluated, 1153 (22%) achieved a raw *P*-Value of 0.05 by *P*<sub>pure</sub>, 1377 (26%) by *P*<sub>enrichment</sub>, 624 (12%) by *P*<sub>random</sub>, 371 (7%) by all 3 raw *P*-Values (Figure 7, Table 6), and all of these are significant at the *SAPS*<sub>q-value</sub> of 0.05. Top-ranking gene sets associated with

poor prognosis in the angiogenic subtype include: a set of targets of miR-33 (associated with poor prognosis) (Figure 8, Table 7). This microRNA has not previously been implicated in ovarian carcinogenesis. Other top hits include several immune response gene sets, which were associated with improved prognosis.

Finally, we analyzed the non-angiogenic subtype of ovarian cancer. Of the 5355 gene sets evaluated, 981 (18%) achieved a raw *P*-Value of 0.05 by *P*<sub>pure</sub>, 957 (18%) by *P*<sub>enrichment</sub>, 658 (12%) by *P*<sub>random</sub>, 261 (5%) by all 3 raw *P*-Values (Figure 7, Table 6), and of these, 254 (5%) are significant at the *SAPS*<sub>q-value</sub> of 0.05 (Figure 9, Table 8). The top ranked pathways associated with improved survival are immune-related gene sets and a gene set found to be negatively associated with metastasis in head and neck cancers.

Integrated Analysis of Breast and Ovarian Cancer Prognostic Pathways

To assess similarities and differences in prognostic pathways in both breast and ovarian cancer molecular subtypes, we performed hierarchical clustering of the disease subtypes using *SAPS*<sub>scores</sub>. Specifically, we identified the 1300 gene sets with *SAPS*<sub>q-value</sub> ≤ 0.05 and absolute value (*SAPS*<sub>score</sub>) ≥ 1.3 in at least one of the breast and ovarian cancer molecular subtypes. We clustered the gene sets and disease subtypes using hierarchical clustering with complete linkage and distance defined as one minus Spearman rank correlation (Figure 10). This analysis shows two dominant clusters of disease subtypes, with one cluster containing ER+/HER2– high proliferation and ER+/HER2– low proliferation breast cancer molecular subtypes, and the second cluster containing ovarian cancer molecular subtypes and the ER–/HER2– and HER2+ breast cancer molecular subtypes. *SAPS*<sub>scores</sub> for within ER+ breast cancer molecular subtypes, within ER–/HER2– and HER2+ breast cancer molecular subtypes, and within ovarian cancer molecular subtypes show high correlation (Spearman rho = 0.61, 0.68, and 0.51, respectively, all *p* < 2.2 × 10<sup>–16</sup>). Interestingly, the *SAPS*<sub>scores</sub> for the ER–/HER2– and HER2+ breast cancer subtypes show far greater correlation with the *SAPS*<sub>scores</sub> in the ovarian cancer molecular subtypes than with the *SAPS*<sub>scores</sub> in ER+ molecular subtypes (median Spearman rho is 0.5 for correlation of ER–/HER2– and HER2+ breast cancer molecular subtypes with ovarian cancer molecular subtypes vs. 0.16 for ER+ molecular subtypes with ER+ molecular subtypes (Figure 10). This analysis demonstrates the importance of performing subtype-specific analyses in breast

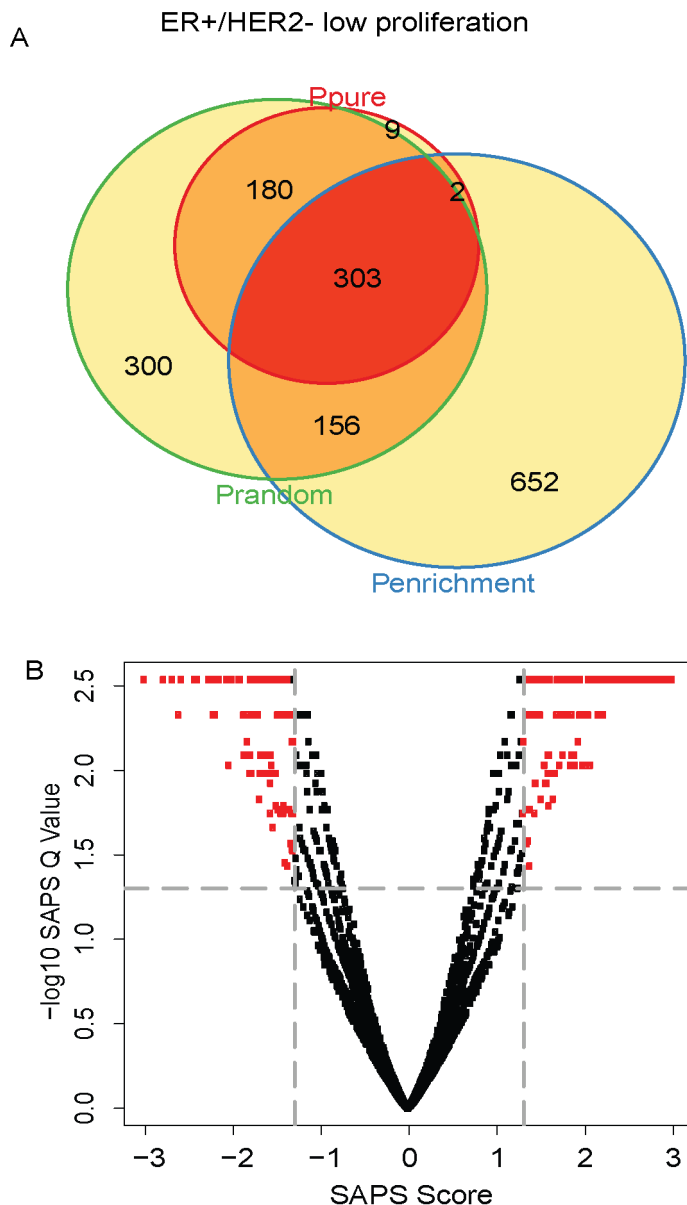

**Figure 4. ER+/HER2- low proliferation Venn diagram and scatterplot.** (A) The gene sets significant by at least one of the P values at the 0.05 level are displayed in a Venn diagram. (B) The  $-\log_{10}$  of the  $SAPS_{q-value}$  is plotted on the y-axis and the  $SAPS_{score}$  along the x axis for each of the 5320 gene sets in the Molecular Signatures Database for their prognostic significance in the ER+/HER2- low proliferation breast cancer molecular subtype. Each point in the scatterplot represents a gene set, and gene sets that achieved a  $SAPS_{q-value} \leq 0.05$  and an absolute value ( $SAPS_{score}$ )  $\geq 1.3$  are colored in red.

doi:10.1371/journal.pcbi.1002875.g004

cancer, as breast cancer is an extremely heterogeneous disease and prognostic pathways in ER-/HER2- and HER2+ breast cancer subtypes are far more similar to prognostic pathways in ovarian cancer than with prognostic pathways in ER+ breast cancer subtypes. Recently, the TCGA breast cancer analysis demonstrated that the “basal” subtype of breast cancer (ER-/HER2-) showed genomic alterations far more similar to ovarian cancer than to other breast cancer molecular subtypes [31]. Our findings show that ER-/HER2- breast cancers share not only genomic alterations but also prognostic pathways with ovarian cancer.

Examining the clusters of gene sets with differential prognostic associations across breast and ovarian cancer molecular subtypes shows three predominant clusters of gene sets. The first cluster is

predominantly composed of proliferation-associated gene sets. The second cluster comprised a mixture of EMT-associated gene sets, gene sets associated with angiogenesis, and with developmental processes. The third is comprised predominantly of gene sets associated with inflammation.

The proliferation cluster of gene sets is strongly associated with poor prognosis in breast cancer overall and ER+ breast cancer subtypes. This supports prior studies demonstrating that proliferation is the strongest factor associated with prognosis in breast cancer overall [15] and in its ER+ molecular subtypes [6]. Interestingly, the proliferation cluster of gene sets shows little association with survival in ER-/HER2- and HER2+ breast cancer and ovarian cancer and its subtypes, and it is the EMT,

**Table 3.** Top prognostic signatures in ER+/HER2 low proliferation.

|                                                  | Size | $SAPS_{q-value}$ | $SAPS_{score}$ | $P_{pure}$ | $P_{random}$ | $P_{enrichment}$ | Dir  |
|--------------------------------------------------|------|------------------|----------------|------------|--------------|------------------|------|
| BERTUCCI_INVASIVE_CARCINOMA_DUCTAL_VS_LOBULAR_DN | 43   | 0.0029           | -3             | 0.000029   | 0.0001       | 0.001            | Good |
| MITOTIC_SPINDLE_ORGANIZATION_AND_BIOGENESIS      | 8    | 0.0029           | 3              | 0.000041   | 0.0001       | 0.001            | Poor |
| KINESIN_COMPLEX                                  | 14   | 0.0029           | 3              | 0.000055   | 0.0001       | 0.001            | Poor |
| M_PHASE                                          | 98   | 0.0029           | 3              | 0.000068   | 0.0001       | 0.001            | Poor |
| MORF_BUB1B                                       | 61   | 0.0029           | 3              | 0.000085   | 0.0001       | 0.001            | Poor |
| BENPORATH_PROLIFERATION                          | 130  | 0.0029           | 3              | 0.00014    | 0.0001       | 0.001            | Poor |
| BROWNE_HCMV_INFECTION_2HR_UP                     | 39   | 0.0029           | -3             | 0.00039    | 0.0001       | 0.001            | Good |
| CHROMOSOME_SEGREGATION                           | 28   | 0.0029           | 3              | 0.00036    | 0.0001       | 0.001            | Poor |
| CHROMOSOMEPERICENTRIC_REGION                     | 30   | 0.0029           | 3              | 0.00024    | 0.0001       | 0.001            | Poor |
| FERREIRA_EWINGS_SARCOMA_UNSTABLE_VS_STABLE_UP    | 120  | 0.0029           | 3              | 0.00081    | 0.0001       | 0.001            | Poor |

Gene sets in the analysis come from the Broad institute's MSigDB. These gene sets can be further evaluated at <http://www.broadinstitute.org/gsea/msigdb/search.jsp>. doi:10.1371/journal.pcbi.1002875.t003

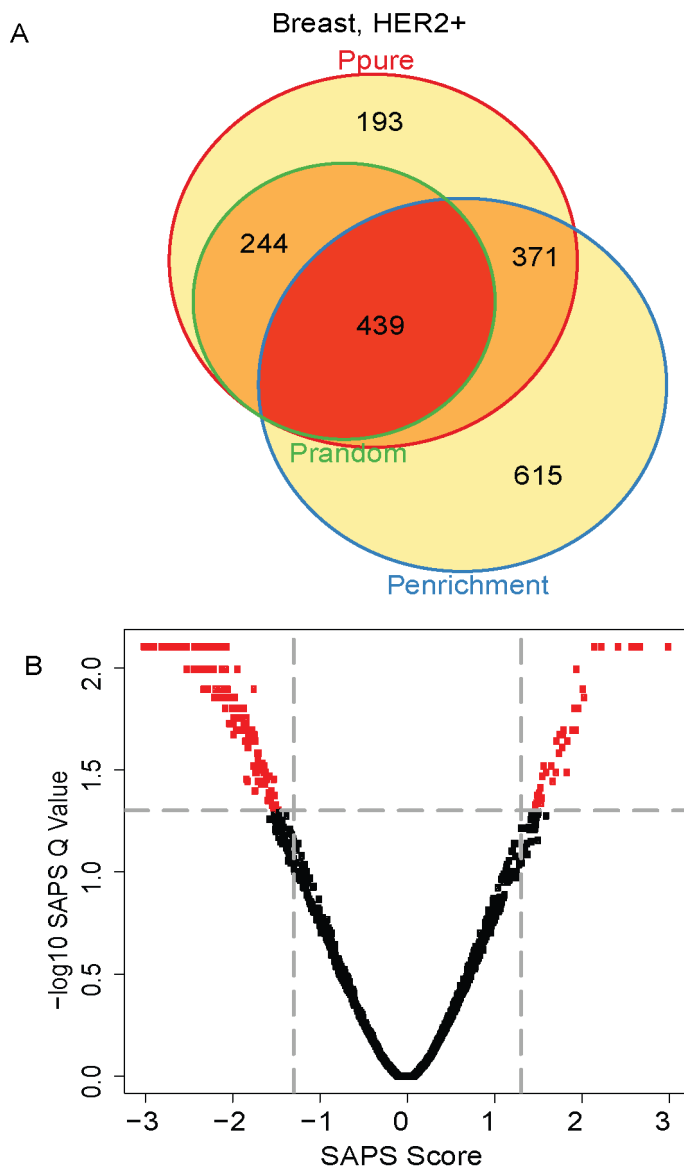

**Figure 5. HER2+ Venn diagram and scatterplot.** (A) The gene sets significant by at least one of the P values at the 0.05 level are displayed in a Venn diagram. (B) The  $-\log_{10}$  of the  $SAPS_{q-value}$  is plotted on the y-axis and the  $SAPS_{score}$  along the x axis for each of the 5320 gene sets in the Molecular Signatures Database for their prognostic significance in the HER2+ breast cancer molecular subtype. Each point in the scatterplot represents a gene set, and gene sets that achieved a  $SAPS_{q-value} \leq 0.05$  and an absolute value ( $|SAPS_{score}| \geq 1.3$ ) are colored in red. doi:10.1371/journal.pcbi.1002875.g005

**Table 4.** Top prognostic signatures in HER2+.

|                                                | Size | $SAPS_{q-value}$ | $SAPS_{score}$ | $P_{pure}$ | $P_{random}$ | $P_{enrichment}$ | Dir  |
|------------------------------------------------|------|------------------|----------------|------------|--------------|------------------|------|
| GNF2_ATM                                       | 26   | 0.0079           | -3             | 2.4E-08    | 0.0001       | 0.001            | Good |
| TSAI_RESPONSE_TO_IONIZING_RADIATION            | 120  | 0.0079           | -3             | 3.1E-08    | 0.0001       | 0.001            | Good |
| ZHU_CMV_ALL_UP                                 | 60   | 0.0079           | -3             | 2.2E-07    | 0.0001       | 0.001            | Good |
| WINTER_HYPOXIA_UP                              | 75   | 0.0079           | 3              | 2.8E-07    | 0.0001       | 0.001            | Poor |
| ZHANG_RESPONSE_TO_IKK_INHIBITOR_AND_TNF_UP     | 180  | 0.0079           | -3             | 6E-07      | 0.0001       | 0.001            | Good |
| GEISS_RESPONSE_TO_DSRNA_UP                     | 30   | 0.0079           | -3             | 7.9E-07    | 0.0001       | 0.001            | Good |
| FARMER_BREAST_CANCER_CLUSTER_1                 | 43   | 0.0079           | -3             | 1.1E-06    | 0.0001       | 0.001            | Good |
| HELLER_HDAC_TARGETS_SILENCED_BY_METHYLATION_DN | 240  | 0.0079           | -3             | 1.4E-06    | 0.0002       | 0.001            | Good |
| JAK_STAT_CASCADE                               | 26   | 0.0079           | -3             | 1.4E-06    | 0.0002       | 0.001            | Good |
| HELLER_HDAC_TARGETS_DN                         | 240  | 0.0079           | -3             | 1.5E-06    | 0.0002       | 0.001            | Good |

Gene sets in the analysis come from the Broad institute's MSigDB. These gene sets can be further evaluated at <http://www.broadinstitute.org/gsea/msigdb/search.jsp>. doi:10.1371/journal.pcbi.1002875.t004

A

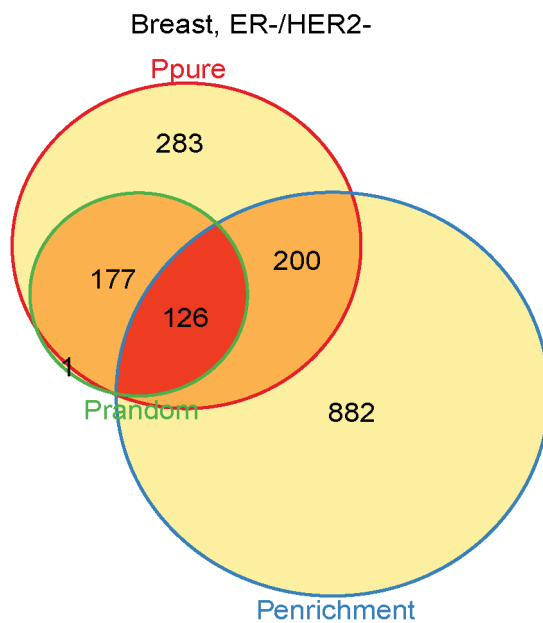

B

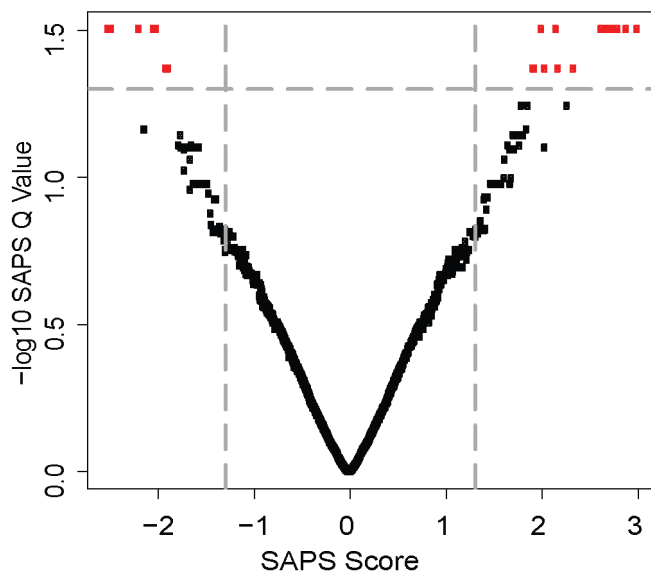

**Figure 6. ER-/HER2- Venn diagram and scatterplot. (A)** The gene sets significant by at least one of the P values at the 0.05 level are displayed in a Venn diagram. **(B)** The  $-\log_{10}$  of the  $SAPS_{q-value}$  is plotted on the y-axis and the  $SAPS_{score}$  along the x axis for each of the 5320 gene sets in the Molecular Signatures Database for their prognostic significance in the ER-/HER2- breast cancer molecular subtype. Each point in the scatterplot represents a gene set, and gene sets that achieved a  $SAPS_{q-value} \leq 0.05$  and an absolute value ( $|SAPS_{score}| \geq 1.3$ ) are colored in red. doi:10.1371/journal.pcbi.1002875.g006

**Table 5.** Top prognostic signatures in ER−/HER2−.

|                                         | Size | $SAPS_{q-value}$ | $SAPS_{score}$ | $P_{pure}$ | $P_{random}$ | $P_{enrichment}$ | Dir  |
|-----------------------------------------|------|------------------|----------------|------------|--------------|------------------|------|
| ELVIDGE_HYPOXIA_BY_DMOG_UP              | 130  | 0.031            | 3              | 0.000089   | 0.0003       | 0.001            | Poor |
| WANG_CISPLATIN_RESPONSE_AND_XPC_DN      | 140  | 0.031            | 3              | 0.00009    | 0.0003       | 0.001            | Poor |
| ELVIDGE_HIF1A_AND_HIF2A_TARGETS_DN      | 100  | 0.031            | 3              | 0.00024    | 0.0008       | 0.001            | Poor |
| WINTER_HYPOXIA_METAGENE                 | 210  | 0.031            | 3              | 0.00064    | 0.0003       | 0.001            | Poor |
| ELVIDGE_HIF1A_TARGETS_DN                | 87   | 0.031            | 2.9            | 0.00014    | 0.0013       | 0.001            | Poor |
| GCM_MLL                                 | 110  | 0.031            | 2.8            | 0.00072    | 0.0016       | 0.001            | Poor |
| GTATTAT,MIR-369-3P                      | 140  | 0.031            | 2.7            | 0.00082    | 0.0018       | 0.001            | Poor |
| CHEN_HOXA5_TARGETS_9HR_UP               | 220  | 0.031            | 2.7            | 0.0021     | 0.0021       | 0.001            | Poor |
| MANALO_HYPOXIA_UP                       | 200  | 0.031            | 2.6            | 0.0024     | 0.0021       | 0.001            | Poor |
| CHAUHAN_RESPONSE_TO_METHOXYESTRADIOL_DN | 96   | 0.031            | −2.5           | 0.00057    | 0.003        | 0.0031           | Good |

Gene sets in the analysis come from the Broad institute's MSigDB. These gene sets can be further evaluated at <http://www.broadinstitute.org/gsea/msigdb/search.jsp>. doi:10.1371/journal.pcbi.1002875.t005

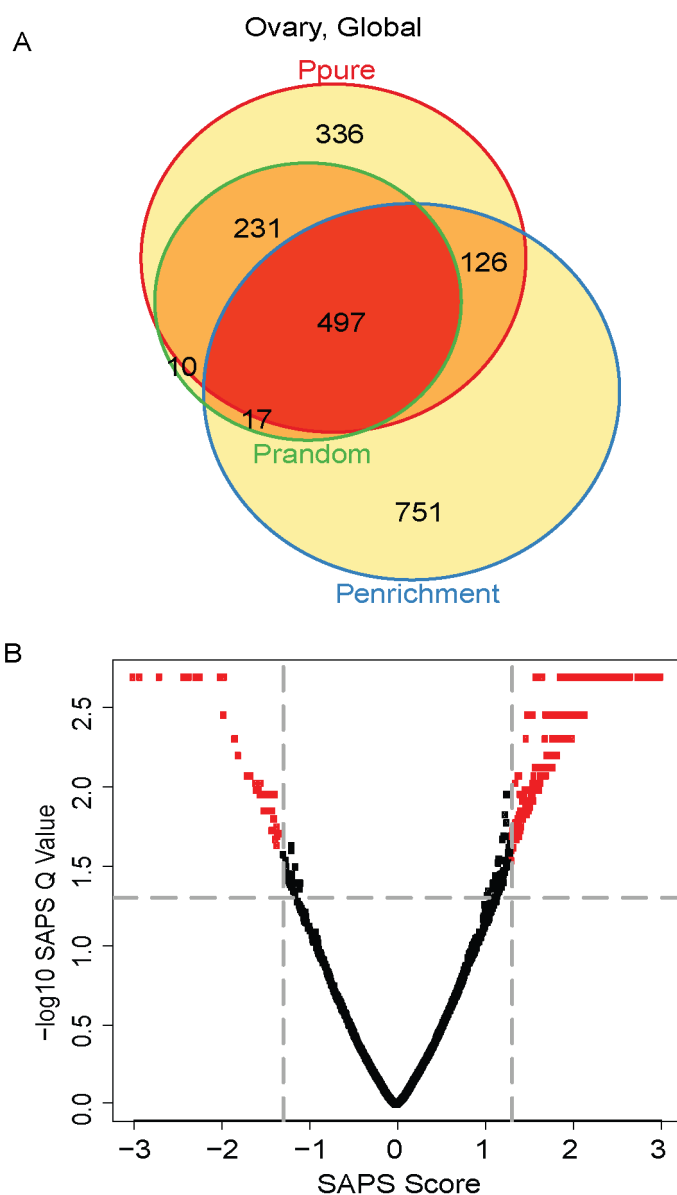

**Figure 7. Global ovarian cancer Venn diagram and scatterplot.** (A) The gene sets significant by at least one of the P values at the 0.05 level are displayed in a Venn diagram. (B) The  $-\log_{10}$  of the  $SAPS_{q-value}$  is plotted on the y-axis and the  $SAPS_{score}$  along the x axis for each of the 5320 gene sets in the Molecular Signatures Database for their prognostic significance in ovarian cancer overall. Each point in the scatterplot represents a gene set, and gene sets that achieved a  $SAPS_{q-value} \leq 0.05$  and an absolute value ( $SAPS_{score}$ )  $\geq 1.3$  are colored in red. doi:10.1371/journal.pcbi.1002875.g007

**Table 6.** Top prognostic signatures in global ovarian cancer.

|                                                  | Size | $SAPS_{q\text{-value}}$ | $SAPS_{score}$ | $P_{pure}$ | $P_{random}$ | $P_{enrichment}$ | Dir  |
|--------------------------------------------------|------|-------------------------|----------------|------------|--------------|------------------|------|
| VSHOX13_01                                       | 25   | 0.002                   | 3              | 7.4E-11    | 0.0001       | 0.001            | Poor |
| VECCHI_GASTRIC_CANCER_ADVANCED_VS_EARLY_UP       | 120  | 0.002                   | 3              | 1.3E-10    | 0.0001       | 0.001            | Poor |
| ONDER_CDH1_TARGETS_2_UP                          | 230  | 0.002                   | 3              | 3.1E-10    | 0.0001       | 0.001            | Poor |
| IZADPANAH_STEM_CELL_ADIPOSE_VS_BONE_DN           | 84   | 0.002                   | 3              | 3.1E-10    | 0.0001       | 0.001            | Poor |
| BERTUCCI_MEDULLARY_VS_DUCTAL_BREAST_CANCER_DN    | 120  | 0.002                   | 3              | 4.5E-10    | 0.0001       | 0.001            | Poor |
| BROWNE_HCMV_INFECTION_24HR_DN                    | 140  | 0.002                   | 3              | 1.2E-09    | 0.0001       | 0.001            | Poor |
| CHARAFE_BREAST_CANCER_BASAL_VS_MESENCHYMAL_DN    | 39   | 0.002                   | 3              | 1.2E-09    | 0.0001       | 0.001            | Poor |
| LIEN_BREAST_CARCINOMA_METAPLASTIC                | 29   | 0.002                   | 3              | 2.4E-09    | 0.0001       | 0.001            | Poor |
| SENESE_HDAC1_AND_HDAC2_TARGETS_DN                | 170  | 0.002                   | 3              | 3.6E-09    | 0.0001       | 0.001            | Poor |
| BERTUCCI_INVASIVE_CARCINOMA_DUCTAL_VS_LOBULAR_DN | 40   | 0.002                   | 3              | 4.6E-09    | 0.0001       | 0.001            | Poor |

Gene sets in the analysis come from the Broad institute's MSigDB. These gene sets can be further evaluated at <http://www.broadinstitute.org/gsea/msigdb/search.jsp>. doi:10.1371/journal.pcbi.1002875.t006

hypoxia, angiogenesis, and development-associated cluster of gene sets that are associated with poor prognosis in these diseases/subtypes with these pathways showing little association with poor prognosis in ER+ breast cancer. The cluster of immune-related pathways tends to show association with improved prognosis across breast and ovarian cancer and their subtypes (**Figure 10**).

## Discussion

A significant body of work has focused on identifying prognostic signatures in breast cancer. Recently, Venet et al. showed that most random signatures are able to stratify patients into groups that show significantly different survival [15]. This work suggests that more sophisticated and statistically rigorous methods are needed to identify biologically informative gene sets based on observed prognostic associations. Here we describe such a statistical and computational framework (Significance Analysis of Prognostic Signature (SAPS)) to allow robust and biologically informative prognostic gene sets to be identified in disease. The basic premise of SAPS is that in order for a candidate gene set's association with prognosis to be used to imply its biological significance, the gene set must satisfy three conditions.

First, the gene set should cluster patients into prognostically variable groups. The p value generated from this analysis is the standard  $P_{pure}$ , which has been frequently used in the literature to indicate a gene set's clinical and biological relevance for a particular disease. A key insight of the SAPS method (building on the work of Venet et al. [15]) is that clinical utility and biological relevance of a gene set are two very different properties, necessitating distinct statistical tests. The  $P_{pure}$  assesses the statistical significance of survival differences observed between two groups of patients stratified using a candidate gene set, and thus this test provides insight into the potential clinical utility of a gene set for stratifying patients into prognostically variable groups; however, this statistical test provides no information to compare the prognostic performance of the candidate gene set with randomly generated ("biologically null") gene sets. We believe that it is essential for a candidate prognostic gene set to not only stratify patients into prognostically variable groups, but to do so in a way that is significantly superior to a random gene set of similar size. Therefore, the second condition of the SAPS method is that a gene set must stratify patients significantly more effectively than a random gene set. This analysis produces the  $P_{random}$ . The  $P_{random}$  directly compares the prognostic association of a candidate gene

set with the prognostic association of "biologically null" random gene sets. Lastly, to avoid selecting a gene set that is linked to prognosis solely by the unsupervised k-means clustering procedure, the SAPS procedure additionally requires a prognostic gene set to be enriched for genes that show strong univariate associations with prognosis. Therefore, the third condition of the SAPS method is that a candidate gene set should achieve a statistically significant  $P_{enrichment}$ , which is a measure of the statistical significance of a candidate gene set's enrichment with genes showing strong univariate prognostic associations. Our results in breast and ovarian cancer and their molecular subtypes demonstrate that the  $P_{enrichment}$  shows only moderate overall correlation with the  $P_{pure}$  and  $P_{random}$  (range Spearman rho = (0.23–0.35), median Spearman rho = 0.30) and there is only moderate overlap between gene sets identified at a raw p value of 0.05 by  $P_{pure}$ ,  $P_{random}$ , and  $P_{enrichment}$  (Figures 2A–9A). These data suggest that the  $P_{enrichment}$  provides useful additional information to the  $P_{pure}$  and  $P_{random}$  and allows prioritization of gene sets that are enriched for genes showing strong univariate prognostic associations.

Summarizing these three distinct statistical tests into a single score is a difficult task as they were each generated using different methods and they test different hypotheses. We chose to use the maximum as the summary function (as opposed to a median or average, for example), as the maximum is a conservative summary measure and it is easily interpretable. It is important to note that the SAPS method provides users with the  $SAPS_{score}$  as well as all 3 component P values (and the 3 component q-values corrected for multiple hypotheses to control the FDR), and therefore the user can choose to use the  $SAPS_{score}$  or to focus on a particular SAPS component, as desired for the specific experimental question being evaluated. Importantly, the SAPS method also performs a permutation-test to estimate the statistical significance of gene set's  $SAPS_{score}$ .

To test the utility of SAPS in providing insight into prognostic pathways in cancer, we performed a systematic, comprehensive, and well-powered analysis of prognostic gene signatures in breast and ovarian cancers and their molecular subtypes. This represents the largest meta-analysis of subtype-specific prognostic pathways ever performed in these malignancies. The analysis identified new prognostic gene sets in breast and ovarian cancer molecular subtypes, and demonstrated significant variability in prognostic associations across the diseases and their subtypes.

We find that proliferation drives prognosis in ER+ breast cancer, while pathways related to hypoxia, angiogenesis, develop-

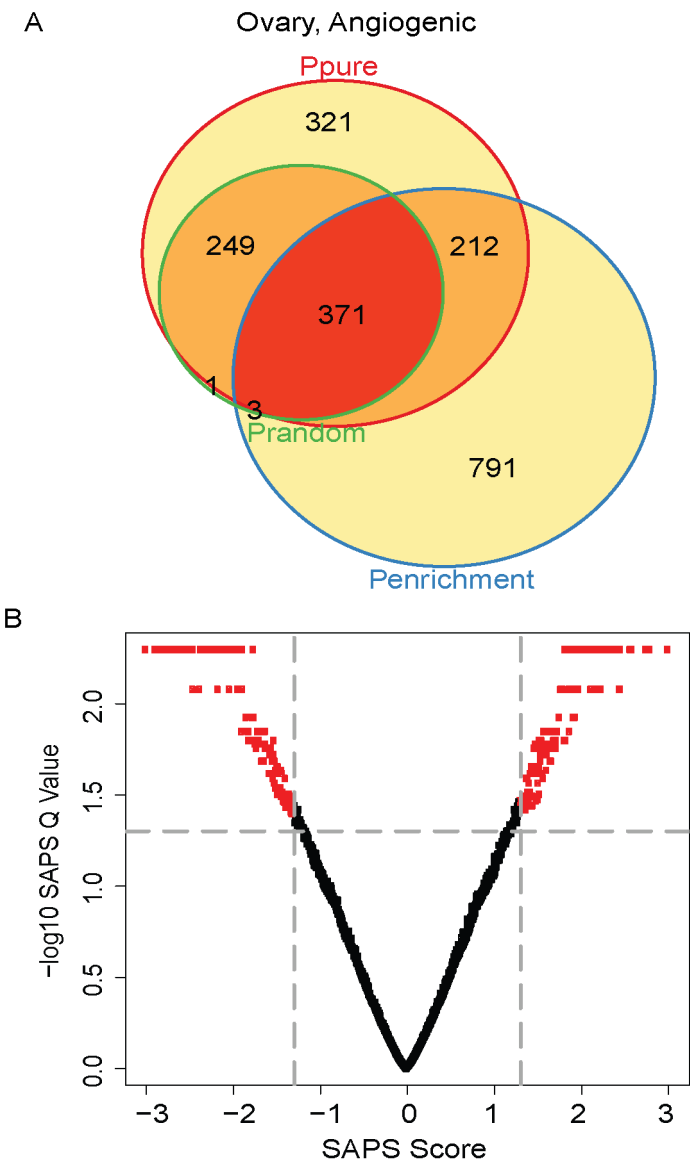

**Figure 8. Angiogenic subtype Venn diagram and scatterplot.** (A) The gene sets significant by at least one of the P values at the 0.05 level are displayed in a Venn diagram. (B) The  $-\log_{10}$  of the  $SAPS_{q-value}$  is plotted on the y-axis and the  $SAPS_{score}$  along the x axis for each of the 5355 gene sets in the Molecular Signatures Database for their prognostic significance in the Angiogenic ovarian cancer molecular subtype. Each point in the scatterplot represents a gene set, and gene sets that achieved a  $SAPS_{q-value} \leq 0.05$  and an absolute value ( $SAPS_{score} \geq 1.3$ ) are colored in red. doi:10.1371/journal.pcbi.1002875.g008

**Table 7.** Top prognostic signatures in Angiogenic overall.

|                                  | Size | $SAPS_{q-value}$ | $SAPS_{score}$ | $P_{pure}$ | $P_{random}$ | $P_{enrichment}$ | Dir  |
|----------------------------------|------|------------------|----------------|------------|--------------|------------------|------|
| CAATGCA_MIR-33                   | 68   | 0.0051           | 3              | 0.000012   | 0.0001       | 0.001            | Poor |
| BIOCARTA_CTL_PATHWAY             | 13   | 0.0051           | -3             | 0.000024   | 0.0005       | 0.001            | Good |
| BIOCARTA_NO2IL12_PATHWAY         | 16   | 0.0051           | -3             | 0.000041   | 0.0005       | 0.001            | Good |
| BIOCARTA_IL12_PATHWAY            | 21   | 0.0051           | -3             | 0.000042   | 0.0007       | 0.001            | Good |
| HOSHIDA_LIVER_CANCER_SUBCLASS_S3 | 250  | 0.0051           | -3             | 0.00007    | 0.0001       | 0.001            | Good |
| FARMER_BREAST_CANCER_CLUSTER_1   | 36   | 0.0051           | -3             | 0.000086   | 0.0006       | 0.001            | Good |
| STTTCRNTTT_V\$IRF_Q6             | 130  | 0.0051           | -3             | 0.00023    | 0.0001       | 0.001            | Good |
| FURUKAWA_DUSP6_TARGETS_PCI35_UP  | 50   | 0.0051           | -3             | 0.00012    | 0.0005       | 0.001            | Good |
| GNF2_RTN1                        | 45   | 0.0051           | 3              | 0.00015    | 0.0008       | 0.001            | Poor |
| ZHU_CMV_ALL_UP                   | 53   | 0.0051           | -3             | 0.00016    | 0.0007       | 0.001            | Good |

Gene sets in the analysis come from the Broad institute's MSigDB. These gene sets can be further evaluated at <http://www.broadinstitute.org/gsea/msigdb/search.jsp>. doi:10.1371/journal.pcbi.1002875.t007

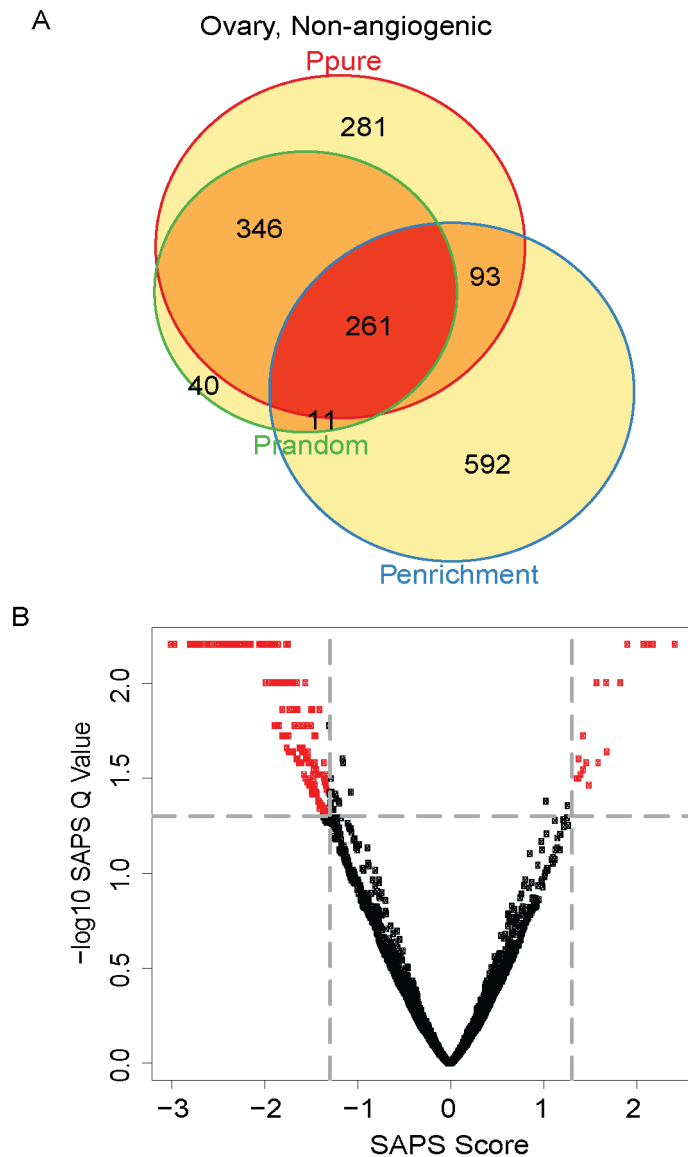

**Figure 9. Non-angiogenic subtype Venn diagram and scatterplot.** (A) The gene sets significant by at least one of the P values at the 0.05 level are displayed in a Venn diagram. (B) The  $-\log_{10}$  of the  $SAPS_{q\text{-value}}$  is plotted on the y-axis and the  $SAPS_{\text{score}}$  along the x axis for each of the 535 gene sets in the Molecular Signatures Database for their prognostic significance in the Non-angiogenic ovarian cancer molecular subtype. Each point in the scatterplot represents a gene set, and gene sets that achieved a  $SAPS_{q\text{-value}} \leq 0.05$  and an absolute value ( $SAPS_{\text{score}} \geq 1.3$ ) are colored in red. doi:10.1371/journal.pcbi.1002875.g009

ment, and expression of extracellular matrix-associated proteins drive prognosis in ER $^-$ /HER2 $^-$  and HER2+ breast cancer and ovarian cancer. We see an association of immune-related pathways with improved prognosis across all subtypes of breast and ovarian cancers. Our analysis demonstrates that prognostic pathways in HER2+ and ER $^-$ /HER2 $^-$  breast cancer are far more similar to prognostic pathways in angiogenic and non-angiogenic ovarian cancer than to prognostic pathways in ER+ breast cancer. This finding parallels the recent identification of similar genomic alterations in ovarian cancer and basal-like (ER $^-$ /HER2 $^-$ ) breast cancer [31].

These results demonstrate the importance of performing subtype-specific analyses to gain insight into the factors driving biology in cancer molecular subtypes. If molecular subtype is not accounted for, prognostic gene sets identified in breast cancer

are strongly associated with proliferation [15]; however, when subtype is accounted for, significant and highly distinct pathways (showing no significant association with proliferation) are identified as driving prognosis in ER $^-$  breast cancer subtypes. Overall, these data show the utility of performing subtype-specific analyses and using SAPS to test the significance of prognostic pathways. Furthermore, our data suggest that ER $^-$  breast cancer subtypes and ovarian cancer may share common therapeutic targets, and future work should address this hypothesis.

In summary, we believe SAPS will be widely useful for the identification of prognostic and predictive biomarkers from clinically annotated genomic data. The method is not specific to gene expression data and can be directly applied to other genomic data types. In the future, we believe that prior to reporting a

**Table 8.** Top prognostic signatures in Non-angiogenic overall.

|                                      | Size | $SAPS_{q-value}$ | $SAPS_{score}$ | $P_{pure}$ | $P_{random}$ | $P_{enrichment}$ | Direction |
|--------------------------------------|------|------------------|----------------|------------|--------------|------------------|-----------|
| KEGG_ASTHMA                          | 27   | 0.0062           | −3             | 6.5E-07    | 0.0001       | 0.001            | Good      |
| BUDHU_LIVER_CANCER_METASTASIS_UP     | 8    | 0.0062           | −3             | 7.3E-07    | 0.0001       | 0.001            | Good      |
| DEPHOSPHORYLATION                    | 64   | 0.0062           | −3             | 0.000015   | 0.0006       | 0.001            | Good      |
| ODONNELL_TARGETS_OF_MYC_AND_TFRC_UP  | 62   | 0.0062           | −3             | 0.000021   | 0.0007       | 0.001            | Good      |
| HUPER_BREAST_BASAL_VS_LUMINAL_DN     | 55   | 0.0062           | −3             | 0.000021   | 0.0007       | 0.001            | Good      |
| SENGUPTA_NASOPHARYNGEAL_CARCINOMA_DN | 180  | 0.0062           | −3             | 0.00011    | 0.0006       | 0.001            | Good      |
| WAMUNYOKOLI_OVARIAN_CANCER_LMP_UP    | 180  | 0.0062           | −3             | 0.00011    | 0.0006       | 0.001            | Good      |
| OKUMURA_INFLAMMATORY_RESPONSE_LPS    | 170  | 0.0062           | −3             | 0.00014    | 0.0009       | 0.001            | Good      |
| RICKMAN_METASTASIS_DN                | 200  | 0.0062           | −3             | 0.00019    | 0.0008       | 0.001            | Good      |
| MCLACHLAN_DENTAL_CARIES_DN           | 210  | 0.0062           | −3             | 0.00022    | 0.0009       | 0.001            | Good      |

Gene sets in the analysis come from the Broad institute’s MSigDB. These gene sets can be further evaluated at <http://www.broadinstitute.org/gsea/msigdb/search.jsp>. doi:10.1371/journal.pcbi.1002875.t008

prognostic gene set, researchers should be encouraged (and perhaps required) to apply the SAPS (or a related) method to ensure that their candidate prognostic gene set is significantly enriched for prognostic genes and stratifies patients into prognostic groups significantly better than the stratification obtained by random gene sets.

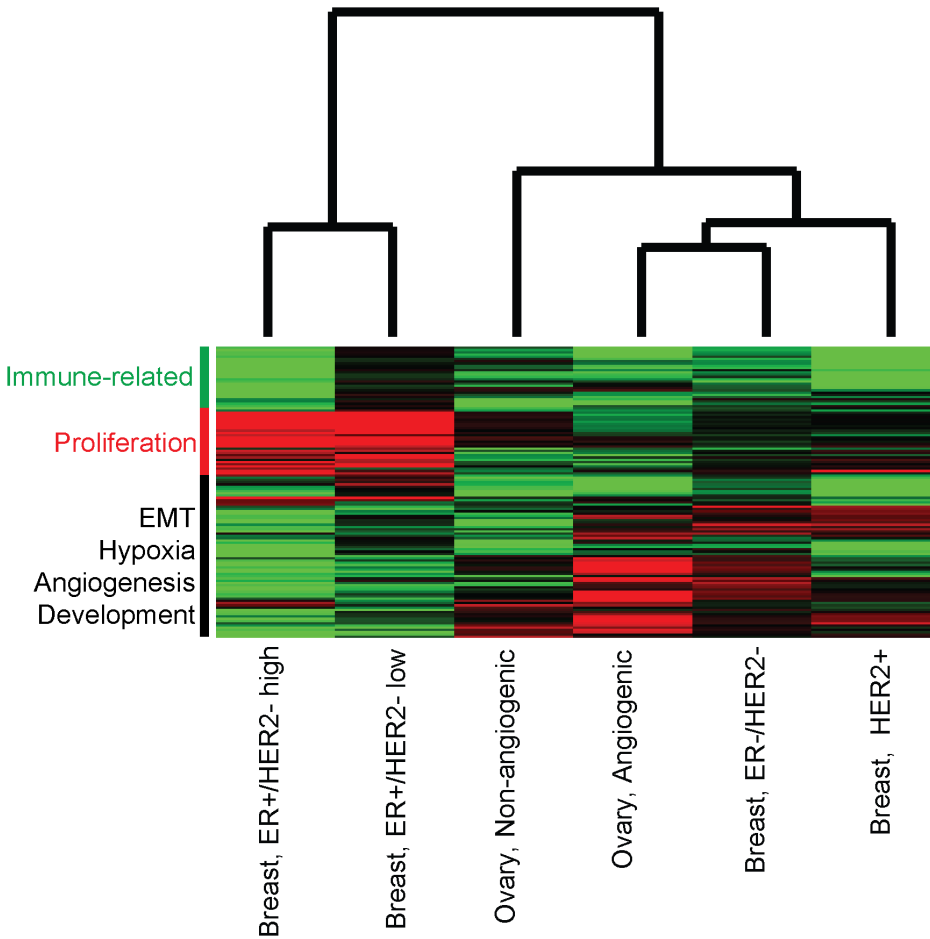

**Figure 10. Hierarchical clustering of breast and ovarian cancers and their subtypes based on SAPS scores.** Breast cancer and ovarian cancer molecular subtypes were clustered with the 1300 gene sets with absolute value ( $SAPS_{score}$ )  $\geq 1.3$  and  $SAPS_{q-value} \leq 0.05$  in at least one disease subtype. Hierarchical clustering was performed on the  $SAPS_{score}$ . In the heatmap, green indicates the gene set is associated with improved prognosis and red with poorer prognosis. doi:10.1371/journal.pcbi.1002875.g010

## Methods

### Breast Cancer Datasets

Data-sets were provided as Supplemental Material in Haibe-Kains et al. [20]. Our analysis included 19 datasets with survival data (total  $n = 3832$ ) (**Table S1**).

### Ovarian Cancer Datasets

Data-sets were provided as Supplemental Material in Bentink et al. [21]. Our analysis included 1735 ovarian cancer patients for whom overall survival data were available (**Table S2**).

### Molecular Subtype Classification

For breast cancer, the SCMGene model [20] was used in the R/Bioconductor *genefu* package [22] to stratify patients into four molecular subtypes: ER+/HER2– low proliferation, ER+/HER2– high proliferation, ER–/HER2– and HER2+. In the ovarian datasets we used ovcAngiogenic model [21] as implemented in *genefu*.

### Creation of Meta-Data Sets

For genes with multiple probes, we selected the probe with the highest variance. We tested two procedures for merging of data: subtype-specific scaling, and traditional (non subtype-specific scaling) (as described in “Data-Scaling and Merging” portion of the manuscript). We excluded genes and cases with more than 50% of data missing. From these reduced data matrices, we imputed missing values using the *impute* package in R [32]. These pre-processed meta-data sets are included as Supporting Information in Dataset S1 for both breast and ovarian cancer using subtype-specific and traditional scaling.

### Gene Sets

Gene sets from the Molecular Signatures Database (MSigDB) [17] (<http://www.broadinstitute.org/gsea/msigdb/collections.jsp>) (“molsigdb.v3.0.entrez.gmt”). Analyses were limited to gene sets of size greater than 1 and less than or equal to 250 genes.

### Application of the Significance Analysis of Prognostic Signatures (SAPS) Procedure and Visualization of SAPS P Values

The SAPS procedure is described in “Significance Analysis of Prognostic Signatures (SAPS)” portion of the manuscript. Briefly, for a candidate gene set, SAPS generates 3 component p-values:  $P_{\text{pure}}$ ,  $P_{\text{random}}$ , and  $P_{\text{enrichment}}$ . The  $SAPS_{\text{score}}$  is the maximum of these values. The  $P_{\text{pure}}$  is the standard log-rank p value, computed by performing K-means clustering with a  $k$  of 2 and assessing the statistical significance of the survival difference between the 2 resulting clusters, implemented using the *survdiff* function in the R package *survival* and extracting the chi-square statistic for a test of equality of the 2 survival curves. To compute the  $P_{\text{random}}$  we generate a distribution of  $P_{\text{pure}}$  from “random” gene sets (we used 10000 random gene sets for a sequence of 8 gene set sizes ranging from 5 to 250), and we calculate the proportion of random gene sets of a similar size to the candidate gene sets that achieve a  $P_{\text{pure}}$  at least as significant as the true  $P_{\text{pure}}$ . To compute the  $P_{\text{enrichment}}$ , we generate “.rnk” files that include each gene and its concordance index for survival, implemented with the function *concordance.index* in the *survcomp* R package. These “.rnk” files are used in a pre-ranked GSEA analysis implemented with the executable jar file *gsea2-2.07* (which is downloadable from: <http://www.broadinstitute.org/gsea/downloads.jsp>). In our analyses, we set a maximum gene set size of 250 and used default GSEA parameters.

The  $SAPS_{\text{score}}$  for each candidate gene set is then computed as the negative  $\log_{10}$  of the maximum of the ( $P_{\text{pure}}$ ,  $P_{\text{random}}$ , and  $P_{\text{enrichment}}$ ) times the direction of the association (positive or negative). The statistical significance of the  $SAPS_{\text{score}}$  is determined by permutation-testing. Specifically, in our experiments, we performed 10000 permutations of the gene labels for each of the sequence of 8 of gene set sizes ranging from 5 to 250. We performed the full SAPS procedure for each of the 80000 permuted gene sets and we generated a null distribution of 10000  $SAPS_{\text{scores}}$  for each of the 8 gene set sizes. The  $SAPS_{p\text{-value}}$  was computed as the proportion of permuted gene sets of a similar size to the candidate gene set that achieved at least as extreme a  $SAPS_{\text{score}}$ . The  $SAPS_{p\text{-values}}$  were then converted to  $SAPS_{q\text{-values}}$  using the method of Benjamini and Hochberg [19].

### Hierarchical Clustering

Hierarchical clustering was performed on the SAPS scores for breast and ovarian cancer molecular subtypes. Hierarchical clustering was performed with one minus Spearman rank correlation as the distance metric and complete linkage, using the Cluster 3.0 package (<http://bonsai.hgc.jp/~mdehoon/software/cluster/>). Clustering results were visualized using Java TreeView (<http://jtreeview.sourceforge.net/>). The Java TreeView files used to generate the Heatmap in Figure 10 are provided in the Supplementary Information (“BreastOvary\_HC.zip”).

An R script and R workspaces for running SAPS on the breast and ovarian cancer meta-data sets and generating Scatterplots and Venn Diagrams of the SAPS P-Values (including all figures from our analyses) are included in Dataset S1 (<http://dx.doi.org/10.5061/dryad.mk471>). The Venn diagrams were generated with the *Vennrable* package in R.

### Supporting Information

**Dataset S1** Supporting information data files, R scripts, and R workspaces. Data deposited in the Dryad repository: <http://dx.doi.org/10.5061/dryad.mk471>. (DOCX)

**Table S1** Breast cancer datasets. (DOCX)

**Table S2** Ovarian cancer datasets. (DOCX)

**Table S3** This excel workbook presents the results of the SAPS analyses in breast cancer. The first column is the molsigdb gene set id. The second column is gene set size. The third column is the  $SAPS_{q\text{-value}}$ . The fourth column is the  $SAPS_{\text{score}}$ . The fifth through seventh columns are the raw  $P_{\text{pure}}$ ,  $P_{\text{random}}$ , and  $P_{\text{enrichment}}$ , respectively. The eighth through 10<sup>th</sup> columns are the q-values associated with the  $P_{\text{pure}}$ ,  $P_{\text{random}}$ , and  $P_{\text{enrichment}}$ . The final column indicates the direction of the prognostic association. Each disease or disease subtype analysis is on one sheet of the workbook. (XLS)

**Table S4** This excel workbook presents the results of the SAPS analyses in ovarian cancer. The first column is the molsigdb gene set id. The second column is gene set size. The third column is the  $SAPS_{q\text{-value}}$ . The fourth column is the  $SAPS_{\text{score}}$ . The fifth through seventh columns are the raw  $P_{\text{pure}}$ ,  $P_{\text{random}}$ , and  $P_{\text{enrichment}}$ , respectively. The eighth through 10<sup>th</sup> columns are the q-values associated with the  $P_{\text{pure}}$ ,  $P_{\text{random}}$ , and  $P_{\text{enrichment}}$ . The final column indicates the direction of the prognostic association. Each disease or disease subtype analysis is on one sheet of the workbook. (XLS)

## Author Contributions

Conceived and designed the experiments: AHB BHK. Performed the experiments: AHB BHK. Analyzed the data: AHB BHK. Contributed

reagents/materials/analysis tools: AHB NWK MMH JK SJS ACC MSS TR BHK. Wrote the paper: AHB JQ BHK.

## References

- Paik S, Tang G, Shak S, Kim C, Baker J, et al. (2006) Gene expression and benefit of chemotherapy in women with node-negative, estrogen receptor-positive breast cancer. *Journal of Clinical Oncology* 24: 3726.
- Loi S, Haibe-Kains B, Desmedt C, Lallemand F, Tutt AM, et al. (2007) Definition of clinically distinct molecular subtypes in estrogen receptor-positive breast carcinomas through genomic grade. *Journal of Clinical Oncology* 25: 1239.
- Sotiriou C, Wirapati P, Loi SM, Harris A, Fox S, et al. (2006) Gene expression profiling in breast cancer: understanding the molecular basis of histologic grade to improve prognosis. *Journal of the National Cancer Institute* 98: 262–272.
- Ivshina AV, George J, Senko O, Mow B, Putti TC, et al. (2006) Genetic reclassification of histologic grade delineates new clinical subtypes of breast cancer. *Cancer Res* 66: 10292–10301.
- Staaf J, Ringnér M, Vallon-Christersson J, Jönsson G, Bendahl PO, et al. (2010) Identification of subtypes in human epidermal growth factor receptor 2-positive breast cancer reveals a gene signature prognostic of outcome. *Journal of Clinical Oncology* 28: 1813.
- Desmedt C, Haibe-Kains B, Wirapati P, Buyse M, Larsimont D, et al. (2008) Biological processes associated with breast cancer clinical outcome depend on the molecular subtypes. *Clinical cancer research : an official journal of the American Association for Cancer Research* 14: 5158–5165.
- Sabatier R, Finetti P, Cervera N, Lambaudie E, Esterni B, et al. (2011) A gene expression signature identifies two prognostic subgroups of basal breast cancer. *Breast cancer research and treatment* 126: 407–420.
- Teschendorff AE, Caldas C (2008) A robust classifier of high predictive value to identify good prognosis patients in ER-negative breast cancer. *Breast Cancer Res* 10: R73.
- Teschendorff AE, Miremadi A, Pinder SE, Ellis IO, Caldas C (2007) An immune response gene expression module identifies a good prognosis subtype in estrogen receptor negative breast cancer. *Genome Biol* 8: R157.
- Weigelt B, Baehner FL, Reis Filho JS (2010) The contribution of gene expression profiling to breast cancer classification, prognostication and prediction: a retrospective of the last decade. *The Journal of Pathology* 220: 263–280.
- Sotiriou C, Pusztai L (2009) Gene-Expression Signatures in Breast Cancer. *N Engl J Med* 360: 790–800.
- Desmedt C, Haibe-Kains B, Wirapati P, Buyse M, Larsimont D, et al. (2008) Biological processes associated with breast cancer clinical outcome depend on the molecular subtypes. *Clinical Cancer Research* 14: 5158.
- Wirapati P, Sotiriou C, Kunkel S, Farmer P, Pradervand S, et al. (2008) Meta-analysis of gene expression profiles in breast cancer: toward a unified understanding of breast cancer subtyping and prognosis signatures. *Breast cancer research : BCR* 10: R65.
- Iwamoto T, Bianchini G, Booser D, Qi Y, Coutant C, et al. (2011) Gene pathways associated with prognosis and chemotherapy sensitivity in molecular subtypes of breast cancer. *Journal of the National Cancer Institute* 103: 264.
- Venet D, Dumont JE, Detours V (2011) Most random gene expression signatures are significantly associated with breast cancer outcome. *PLoS Comput Biol* 7: e1002240.
- Schroder MS, Culhane AC, Quackenbush J, Haibe-Kains B (2011) survcomp: an R/Bioconductor package for performance assessment and comparison of survival models. *Bioinformatics* 27: 3206–3208.
- Subramanian A, Tamayo P, Mootha VK, Mukherjee S, Ebert BL, et al. (2005) Gene set enrichment analysis: a knowledge-based approach for interpreting genome-wide expression profiles. *Proc Natl Acad Sci U S A* 102: 15545–15550.
- Subramanian A, Kuehn H, Gould J, Tamayo P, Mesirov JP (2007) GSEA-P: a desktop application for Gene Set Enrichment Analysis. *Bioinformatics* 23: 3251–3253.
- Benjamini Y, Hochberg Y (1995) Controlling the false discovery rate: a practical and powerful approach to multiple testing. *Journal of the Royal Statistical Society Series B (Methodological)*: 289–300.
- Haibe-Kains B, Desmedt C, Loi S, Culhane AC, Bontempi G, et al. (2012) A three-gene model to robustly identify breast cancer molecular subtypes. *J Natl Cancer Inst* 104: 311–325.
- Bentink S, Haibe-Kains B, Risch T, Fan JB, Hirsch MS, et al. (2012) Angiogenic mRNA and microRNA Gene Expression Signature Predicts a Novel Subtype of Serous Ovarian Cancer. *PLoS One* 7: e30269.
- Haibe-Kains B, Schroeder M, Bontempi G, Sotiriou C, Quackenbush J (2011) Genefu: Relevant Functions for Gene Expression Analysis, Especially in Breast Cancer. R/Bioconductor. version: Development (2.12).
- Shi L, Reid LH, Jones WD, Shippy R, Warrington JA, et al. (2006) The MicroArray Quality Control (MAQC) project shows inter- and intraplatform reproducibility of gene expression measurements. *Nat Biotechnol* 24: 1151–1161.
- Alibes A, Yankilevich P, Canada A, Diaz-Uriarte R (2007) IDconverter and IDClight: conversion and annotation of gene and protein IDs. *BMC Bioinformatics* 8: 9.
- Troyanskaya O, Cantor M, Sherlock G, Brown P, Hastie T, et al. (2001) Missing value estimation methods for DNA microarrays. *Bioinformatics* 17: 520–525.
- van't Veer LJ, Dai H, Van De Vijver MJ, He YD, Hart AAM, et al. (2002) Gene expression profiling predicts clinical outcome of breast cancer. *Nature* 415: 530–536.
- Cheang MC, Chia SK, Voduc D, Gao D, Leung S, et al. (2009) Ki67 index, HER2 status, and prognosis of patients with luminal B breast cancer. *J Natl Cancer Inst* 101: 736–750.
- Chi JT, Wang Z, Nuyten DSA, Rodriguez EH, Schaner ME, et al. (2006) Gene expression programs in response to hypoxia: cell type specificity and prognostic significance in human cancers. *PLoS medicine* 3: e47.
- Buffa FM, Harris AL, West CM, Miller CJ (2010) Large meta-analysis of multiple cancers reveals a common, compact and highly prognostic hypoxia metagene. *Br J Cancer* 102: 428–435.
- Silver DP, Richardson AL, Eklund AC, Wang ZC, Szallasi Z, et al. (2010) Efficacy of neoadjuvant Cisplatin in triple-negative breast cancer. *J Clin Oncol* 28: 1145–1153.
- Koboldt DC, Fulton RS, McLellan MD, Schmidt H, Kalicki-Verizer J, et al. (2012) Comprehensive molecular portraits of human breast tumours. *Nature* 490: 61–70.
- Troyanskaya O, Cantor M, Sherlock G, Brown P, Hastie T, et al. (2001) Missing value estimation methods for DNA microarrays. *Bioinformatics* 17: 520–525.
